# Supplementary material for: Older Adults’ Perspectives of Smart Technologies to Support Aging at Home: Insights from Five World Café Forums
Source: MDPI journal article supplement (doi:10.3390/ijerph19137817), 2022-06-25
Supplement: s1 [file s1]

## Supplementary File for “Older adults' perspectives of smart technologies to support aging at home: Insights from five World Café forums”

### Videos used as illustrative examples

Videos were used in the World Cafes to introduce participants to smart technologies which might be used to support older people living in the community

### Autonomous vehicles

How driverless cars from CBC News, Canada, January 7<sup>th</sup> 2016, First 3.35 minutes

<https://www.youtube.com/watch?v=XEebyt6G5kM>

### Robots

Eldercare robots, Voice of America, Sept 19 2018, First 2.54 minutes.

[https://www.youtube.com/watch?v=P\\_0jzsNF8kA](https://www.youtube.com/watch?v=P_0jzsNF8kA)

Robot chores, Getty images TV, Dec 21 2017, First 1.48 minutes.

[https://www.youtube.com/watch?v=3xWOzklsv-c,](https://www.youtube.com/watch?v=3xWOzklsv-c)

I tried cleaning my entire apartment with robots, Home Insider, First 2 minutes.

<https://www.youtube.com/watch?v=20v6eMRQVg>

Amazon Echo Alexa for people with disabilities, Assistive technology blog, First 3 minutes.

<https://youtu.be/58eAWc1fRoQ>

### Smart Wearables/Homes

Consumer IOT, Elderly care. Genny.io, 2017. Complete video.

<https://www.youtube.com/watch?app=desktop&v=BCK-v0cWE3k>
